# Supplementary material for: Structural insights into the Caprin-2 HR1 domain in canonical Wnt signaling
Source: PubMed Central journal article supplement (PMC11480233; doi:10.1016/j.jbc.2024.107694), 2024-08-17
Supplement: mmc1.pdf [file mmc1.pdf]

Sample Information

Data Filename : blank\_20110314\_\_D01.lcd  
Sample Name : blank  
Method Filename : Manipulation.lcm  
Date Acquired : 2011-3-14 15:42:08  
Background Filename :

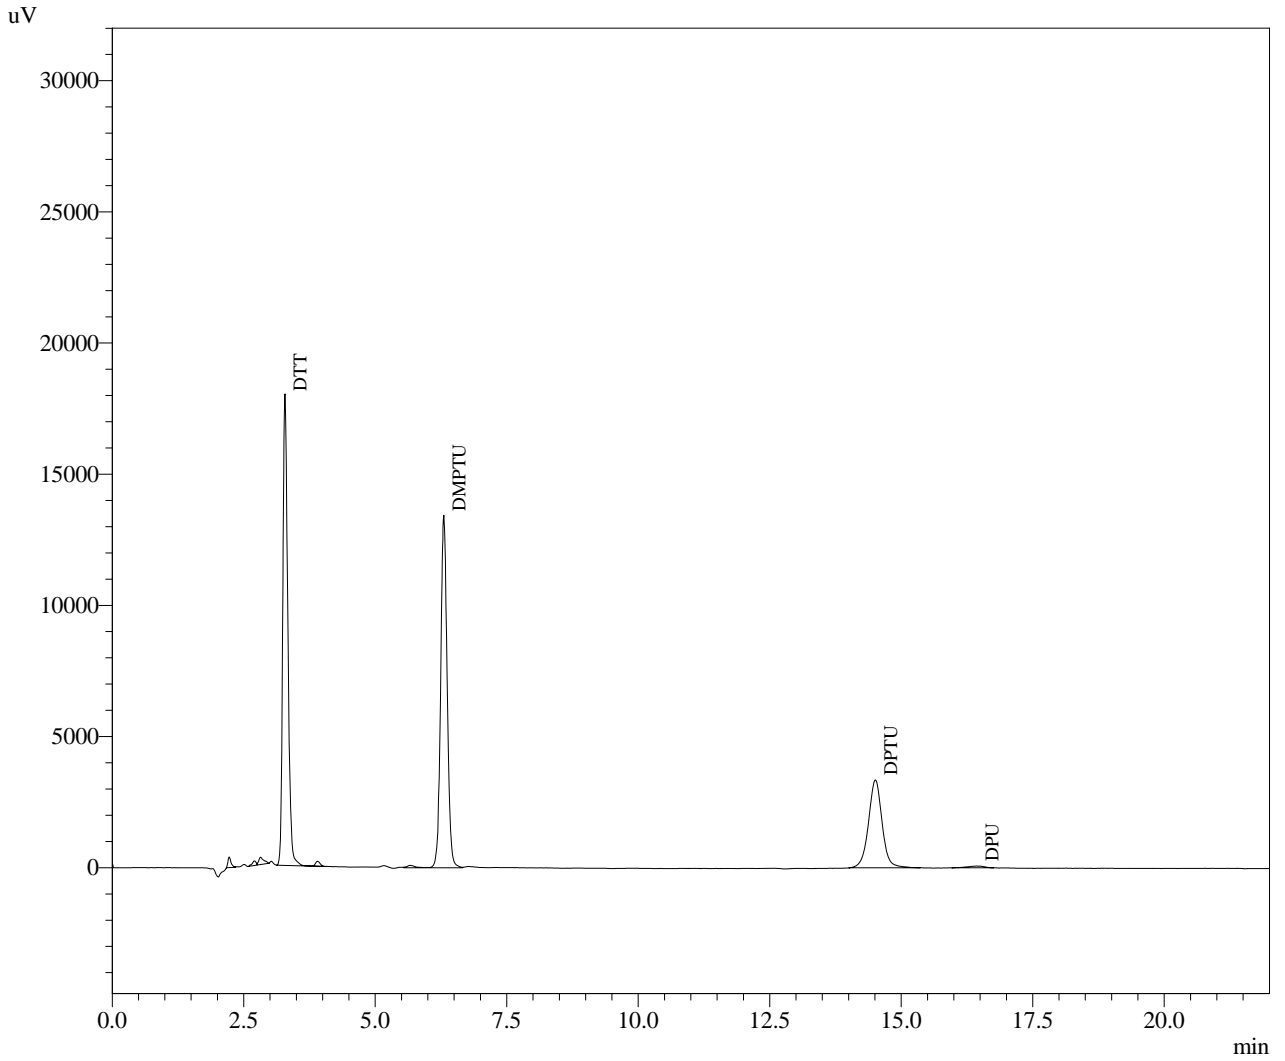

Sample Information

Data Filename : 20110315\_PTH-AA\_D01.lcd  
Sample Name : 20110315\_PTH-AA  
Method Filename : 20110315\_PTH-AA.LCM  
Date Acquired : 2011-3-15 9:38:05  
Background Filename :

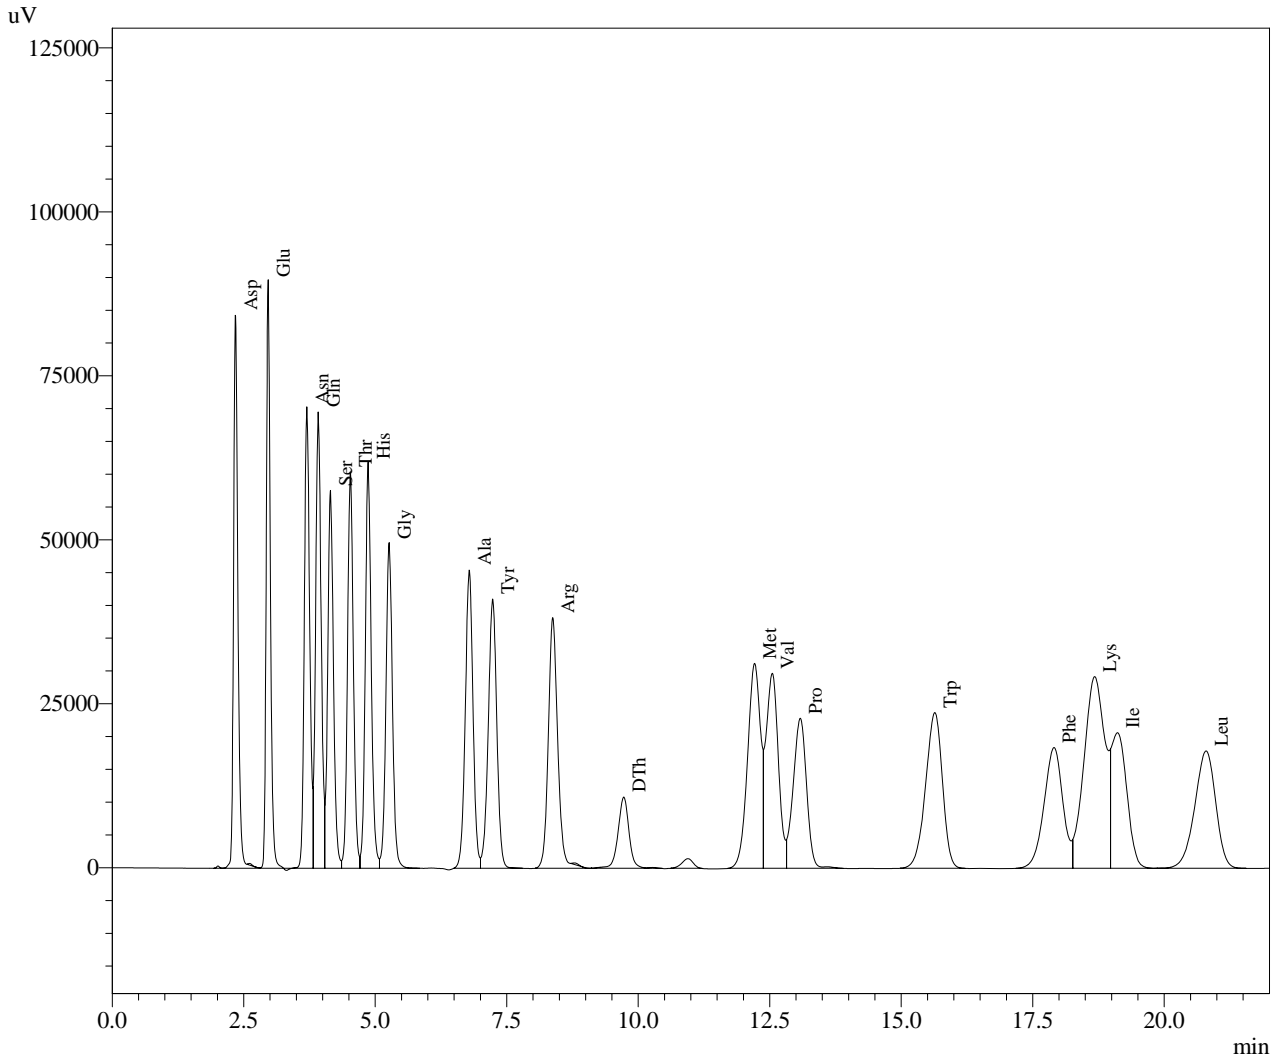

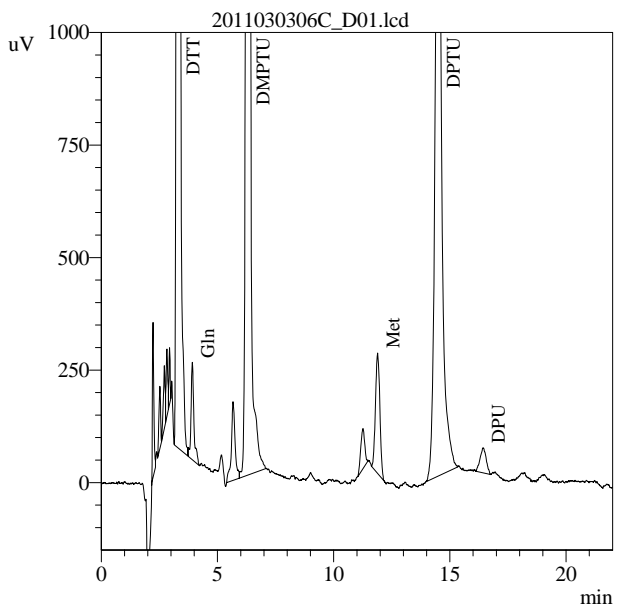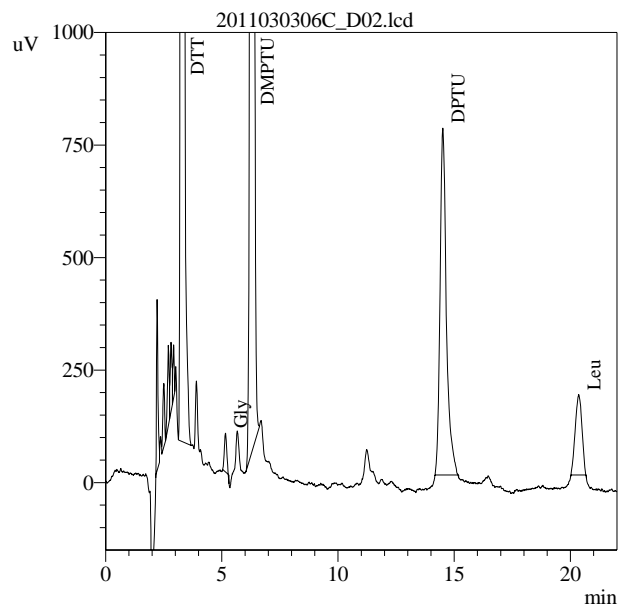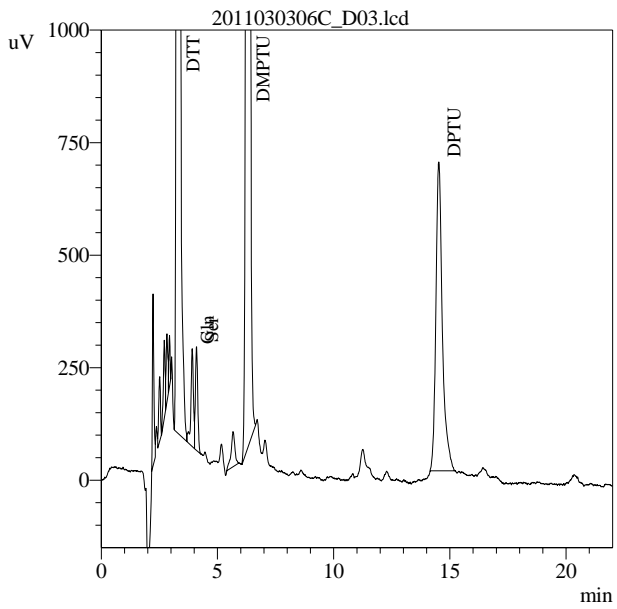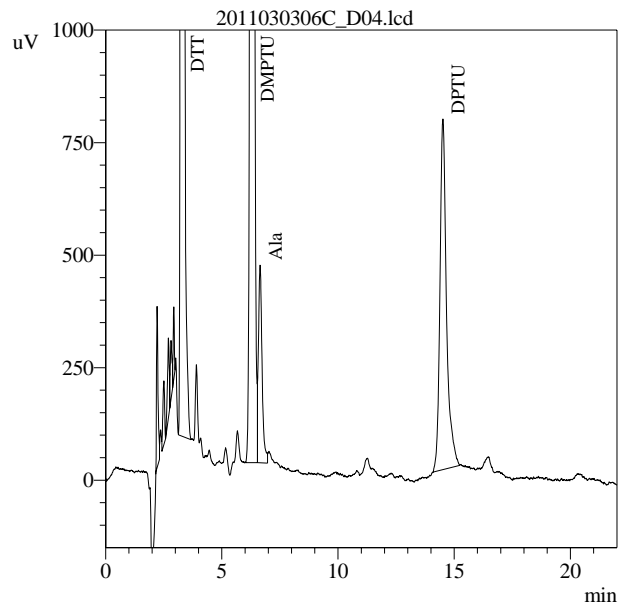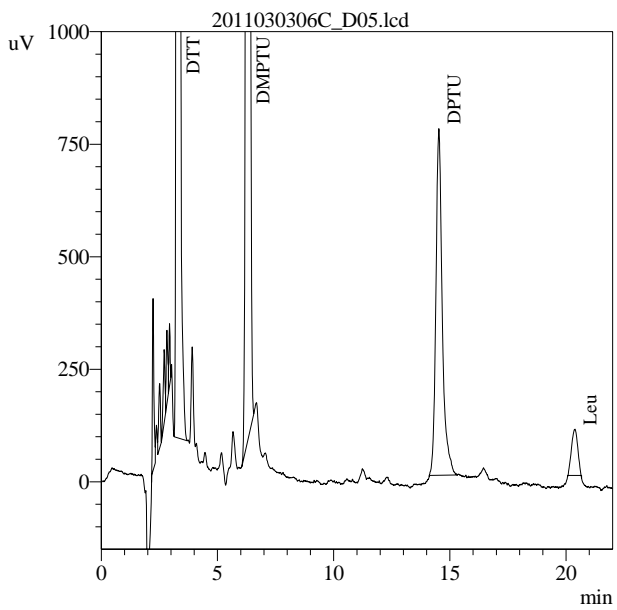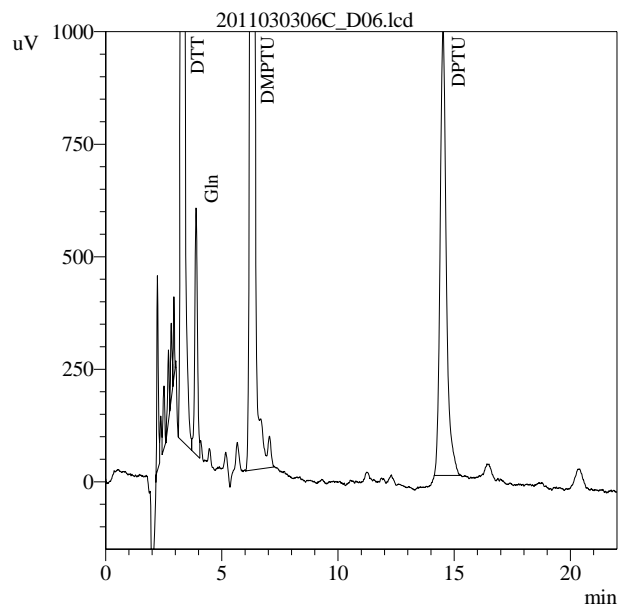

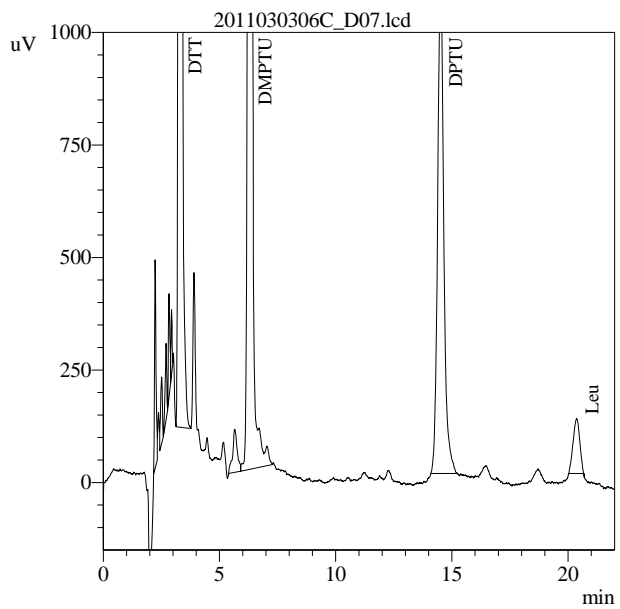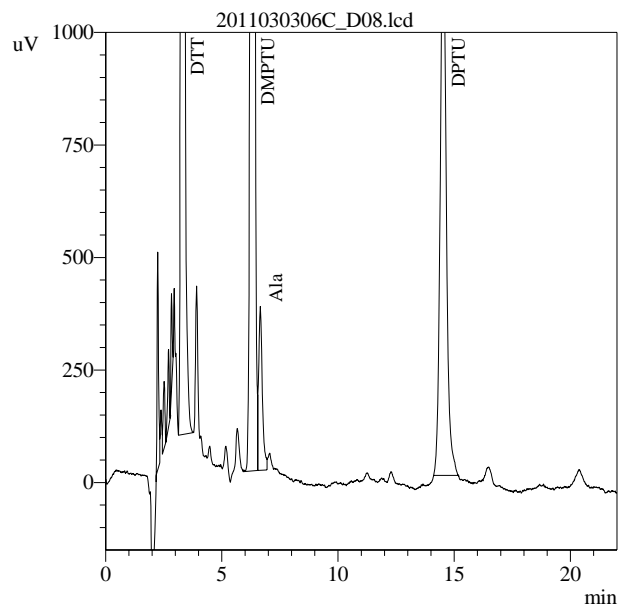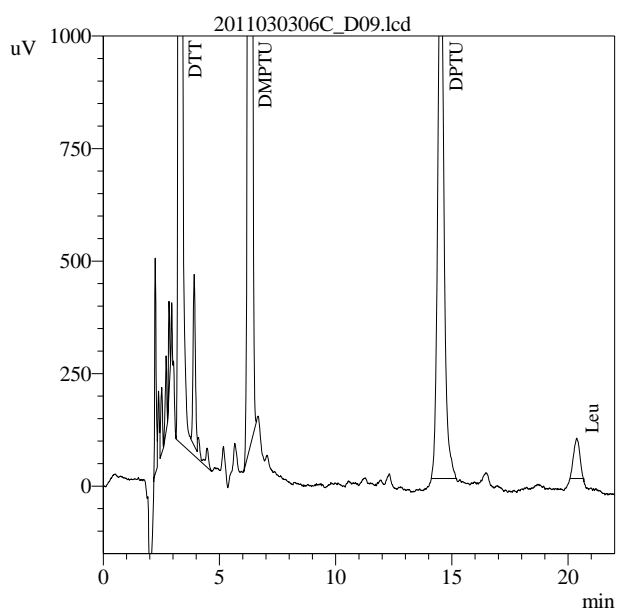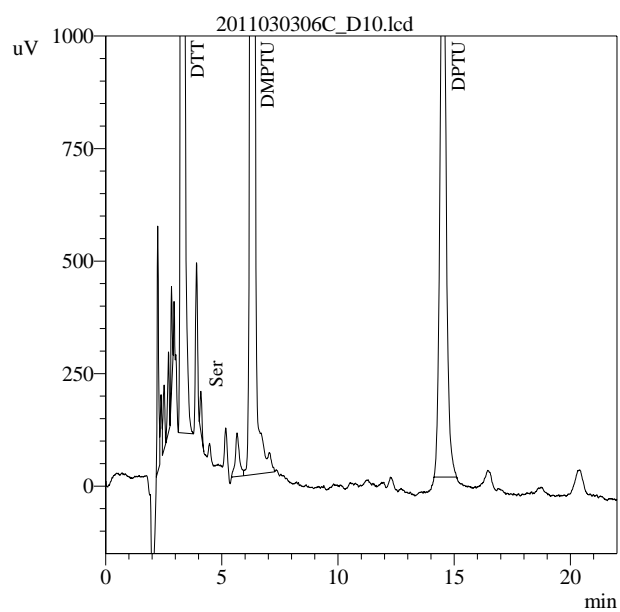

**Final Report**

|                   |                                  |              |             |         |
|-------------------|----------------------------------|--------------|-------------|---------|
| Sample name       | Cap2-HR1                         | Lot number   | --          |         |
| Sample state      | PVDF                             | Estimated MS | 29000 Da    |         |
| Instrument model  | PPSQ-33A<br>SHIMADZU CORPORATION |              |             |         |
| Sequencing result | Residue No.                      | aa name      | Residue No. | aa name |
|                   | 1                                | M、Q          | 2           | L、G     |
|                   | 3                                | S、Q          | 4           | A       |
|                   | 5                                | L            | 6           | Q       |
|                   | 7                                | L            | 8           | A       |
|                   | 9                                | L            | 10          | S       |
